# Supplementary material for: BET bromodomain inhibitors and agonists of the beta-2 adrenergic receptor identified in screens for compounds that inhibit DUX4 expression in FSHD muscle cells
Source: PubMed Central journal article supplement (PMC5584331; doi:10.1186/s13395-017-0134-x), 2017-09-04

# MBD3L2

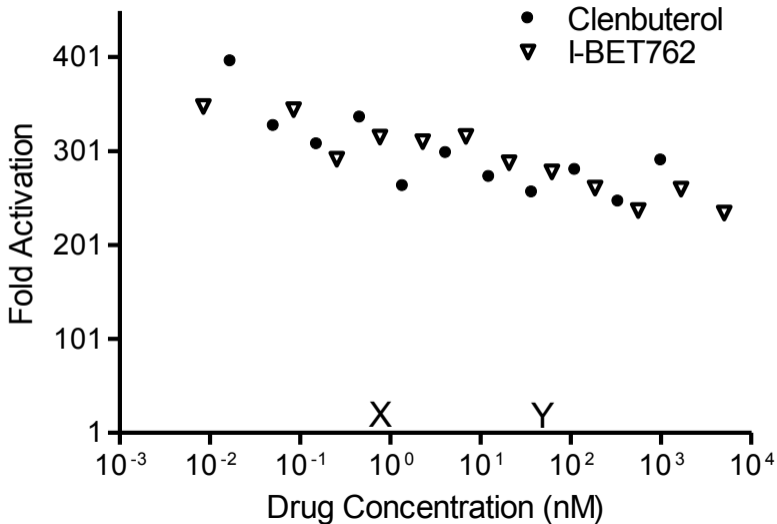

Supplement: 13395_2017_134_MOESM6_ESM.pdf [file 13395_2017_134_MOESM6_ESM.pdf]
